# Supplementary figures and images for: Avelumab in Combination With Lorlatinib or Crizotinib in Patients With Previously Treated Advanced NSCLC: Phase 1b/2 Results From the JAVELIN Lung 101 Trial
Source: PubMed Central journal article supplement — JTO Clin Res Rep. 2024 May 16;5(7):100685. doi: 10.1016/j.jtocrr.2024.100685 (PMC11260014; doi:10.1016/j.jtocrr.2024.100685), 2024-05-16

Supplementary Figure 1

A

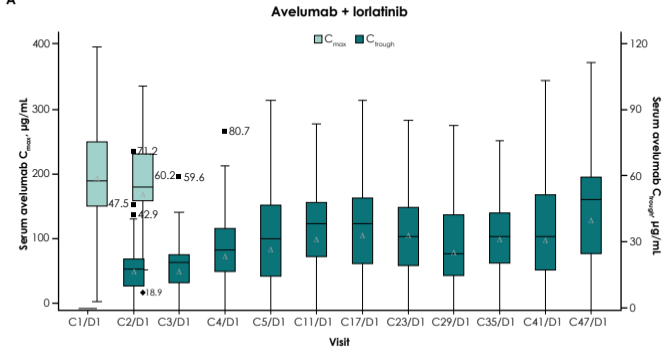

B

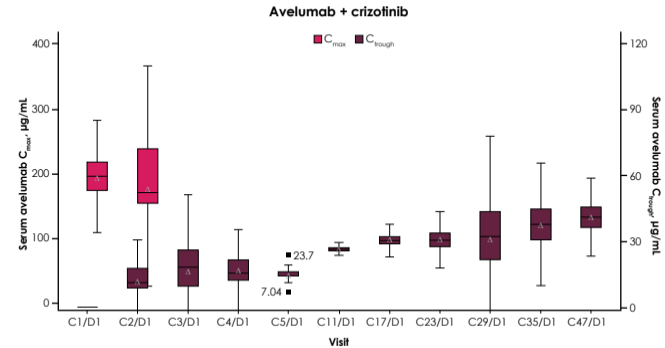

Supplement: mmc2.pdf [file mmc2.pdf]
